# Supplementary material for: Cytological characterization of a thermo-sensitive cytoplasmic male-sterile wheat line having K-type cytoplasm of Aegilops kotschyi
Source: PubMed Central journal article supplement — Breed Sci. 2016 Nov 26;66(5):752–61. doi: 10.1270/jsbbs.16039 (PMC5282749; doi:10.1270/jsbbs.16039), 2016-11-26
Supplement: 66_16039_2.pdf [file 66_16039_2.pdf]

Supplemental Table 1. Anther development stages and corresponding typical plant morphologies in the male sterile lines KTM3315A grown in the field

| Developmental stage        | General description                                                  | Scale (Zadoks) |
|----------------------------|----------------------------------------------------------------------|----------------|
| Meiosis phase              | Flag leaf sheath extending                                           | 41             |
| Tetrad phase               | Flag leaf sheath opening                                             | 47             |
| Early uninucleate phase    | First visible awns                                                   | 49             |
| Medium uninucleate phase   | Awns extending 0–2 cm                                                | -              |
| Late uninucleate phase     | Awns extending 2–5cm long                                            | -              |
| Early binucleate phase     | First spikelet of head visible                                       | 50             |
| Medium binucleate phase    | Half of head visible                                                 | 54             |
| Late binucleate phase      | Head completely emerged                                              | 58             |
| Trinucleate phase          | Head completely emerged, 5 cm long                                   | -              |
| Late trinucleate phase     | Flowering usually begins in the middle part of the head              | 60             |
| Mature pollen grains phase | Flowering usually completed in the upper and lower parts of the head | -              |
